# Supplementary material
Source: publisher figshare collection journal article supplement (https://geolsoc.figshare.com/articles/dataset/_/3454469)
Supplement: Supplementary file 1 [file 1]

Appendix 1. Mineral assemblages of non-graphitic pelites of the Leven Schist and Islay Quartzite formations, southern sector of the Etive aureole.

National Grid coordinates: sheet NN. Mineral name abbreviations from Kretz (1983).
Symbols:- £: contains distinct S2-parallel leucosomes; : contains distinct vein leucosomes. X: mineral of main contact-metamorphic assemblage; r: relict regional-metamorphic mineral; p: former existence of regional-metamorphic mineral inferred from pseudomorphs; [x]: only within pseudomorphs after garnet; (x): former existence of contact-metamorphic mineral inferred from pseudomorphs; a: retrograde alteration product; : only in S2-parallel leucosomes; : only in vein leucosomes; : only in leucosomes (both vein and S2-parallel types). *: Sample analysed by EPMA. Bold type: minerals analysed by EPMA.

Different rock samples from the same locality are designated a, b, c ... etc. Assemblages designated i, ii etc from the same numbered sample reflect different domains (usually layers) within the same thin section.

__________________________________________________________________________________________________________________________________________ _

*Zone Sample Grid Distance from Mineral assemblage*

*Reference contact (m)*

__________________________________________________________________________________________________________________________________________ _

**Ms Chl Bt Crd And Sill Crn Spl Grt Opx Qtz Kfs Pl Ilm Zrn Ap Trm**

Biotite * MM56a 1156 2680 1470 **X** a **X** X X X X X

* MM56b 1156 2680 1470 **X** X X X X X X

MM57a 1140 2669 1470 X X X X X X

MM55 1174 2692 1420 X X X X X X
 MM220 1230 2739 1290 X X X X X X

MM219 1235 2743 1280 X X X X X X

MM218 1241 2747 1270 X X X X X X

__________________________________________________________________________________________________________________________________________ _

Cordierite T950 117 270 1330 X a X X X X

T952 123 275 1200 X X X X X X X

MM222 1337 2837 1190 X a X X r X X X X X X X

__________________________________________________________________________________________________________________________________________ _

**Ms Chl Bt Crd And Sill Crn Spl Grt Opx Qtz Kfs Pl Ilm Zrn Ap Trm**

Andalusite * MM155 1208 2746 1130 a **X** X X r X X X X X X X

+ K-feldspar MM125a 1177 2728 1120 a X X X X X X X

MM126b 1174 2731 1070 a a X X X X X X X X

MM127d 1165 2726 1070 a a X X X p X X X X X X X

* MM180b 1302 2814 1060 **X** **X X X** p X **X** X X X X X +Gph

MM128a 1164 2734 1010 a a X X X X X X

MM154 1206 2760 990 a a X X X X X X X X X

* MM181 1249 2787 970 a **X** **X** X X **X** X X X X

* MD1 1139 2618 950 **X** **X** **X** X p X **X** X X X X

MD14 126 279 950 X X X X X X X

MM182a 1245 2795 890 a a X X p X X X X X X X

MM182b 1245 2795 890 a a X X X [x] p X X X

* MM153 1203 2771 880 a **X** **X** X X X X X X

MD13 124 281 810 a a X X X X X X X

MM157 1316 2878 740 a X X X X X X X X

__________________________________________________________________________________________________________________________________________ _

**Ms Chl Bt Crd And Sill Crn Spl Grt Opx Qtz Kfs Pl Ilm Zrn Ap Trm**

Corundum MM129-i 1157 2755 800 X X X X X X X X X X

MM129-ii 1157 2755 800 a X X X X X X X X X X

* MD2b 1122 2725 770 **X** **X X X** **X** X **X** X X

MM152 1195 2783 750 a X X X X X X X X X

MD22a-i 1256 2817 720 a X X X X X X X X X

MD22b-i 1256 2817 720 X X X X X X X X

MD22b-ii 1256 2817 720 a a X X p X X X X X

MM130b-i 1131 2749 710 X X X X X X X X X

MD23 1255 2828 660 a a X X X X X X X X X

MM184b-i 1231 2818 620 a X X X X X X X X X

* MM184b-ii 1231 2818 620 a **X** **X** **X** X **X** X X X X

__________________________________________________________________________________________________________________________________________ _

**Ms Chl Bt Crd And Sill Crn Spl Grt Opx Qtz Kfs Pl Ilm Zrn Ap Trm**

Spinel * MM151-i 1188 2786 680 **X** **X** X **X** X X

MM151-ii 1188 2786 680 X X X **X** X X X X X

MM131a-ii 1134 2763 640 a X X X X X X X X

* MM131b-i 1134 2763 640 **X** **X** X X **X** X X X X

* MM131b-ii 1134 2763 640 **X** **X** X X **X** X X X

* MM149 1187 2801 540 a **X** **X** X **X** X X X X

MD24-i 1243 2839 500 a X X X X X X X X

DIE11 1243 2839 500 a X X X X X X X X X

MM185a 1219 2825 490 a X X X X  X X X X

* MM185b 1219 2825 490 a **X** **X** X X  **X** **X** X X X

MM176 1264 2859 470 X X X X [x] p X X X X X X

MM133-i 1144 2787 450 X X X X X X X X X

* MM133-ii 1144 2787 450 X **X** X **X** p X X X X X

MM133-ii i 1144 2787 450 £ a X X X X X X X X X

MM186a-i 1209 2826 430 £ a X X X  X X X X X

MM186a-ii 1209 2826 430 £ a X X X X X X X X

MM186b 1209 2826 430 £ a X X X X X X X X X

MD5-i 110 276 420 a a X X X X X X X X

MD5-ii 110 276 420 a a X X X X X X X

* MM134a 1139 2790 400 **X** **X** **rX** X **X** X X X X

DIE12a 1226 2839 400 a X X X X X X X X X

* MM187a 1205 2830 390 a **X** **X** X X **X** X X X X

* MM147-i 1177 2815 370  a X X X X  X X X X X

MM135a-i 1137 2795 350 a X X X X X X X X

MM135a-ii 1137 2795 350 X X X X X X X X X

DIE3b-i 1266 2881 340 a X X X X X X X X X X

MD16a-i 1266 2881 340 £ a X X X X X X X X X

MD16c-i 1266 2881 340 a X ? X X X X X X

MM188b 11992832 330 £ a X X X X X X X

* MM188c 11992832 330 a **X** **X** X X X X X X X

* MM188d-i 11992832 330 a **X** **X** X X **X** X X X X +Rt?

* MM189a 1198 2835 320 a **X** **X** X X X **X** X X X

MM174b 1254 2876 300 £ a X X X X  X X X X X

MD6 110 278 270 £ a X X X X X  X X X

DIE4a 1263 2890 260 a X X X X X X X X

MD25 1228 2858 250 a X X X X X X X X

* MD12b 120 284 240 £ a **X** **X** X X **X**  **X** X X X X

MD7b 110 279 200 £ a X X X X X  X X X X X

MM172a 1244 2877 200 a X X X X X X X X

MM172b 1244 2877 200 X X r X X X X X X

* MM146 1173 2834 190 **X** **X** X X **X** **X** **X** X X X

* MM171 1241 2878 180 a **X** **X** X X **X** **X** X X X X

MM144 1162 2833 140 a X X X X X X X X

MM192b 1190 2852 120 a X X X X X X X X X

MD8b 112 281 120 £ X X X X  X X X

__________________________________________________________________________________________________________________________________________ _

**Ms Chl Bt Crd And Sill Crn Spl Grt Opx Qtz Kfs Pl Ilm Zrn Ap Trm**

Sillimanite MD20b-i 1227 2864 210 £ a X X X X X X X X X

MD20b-ii 1227 2864 210 X X X X X X X

DIE7b-i 1227 2864 210 £ X X X X X  X X X X X

DIE7c 1227 2864 210 £ a X X X X X X X

MM169b-i 1232 2875 140 £ a **X** **X** X X X X X

* MM169b-ii 1232 2875 140 **X** **X** X X **X** **X** X X X

MM195a 1228 2874 140 X X X X X X X X

MM195b-i 1228 2874 140 a X X X X X X X X X

MM195b-ii 1228 2874 140  a X X X X X X X X

MM195b-iii 1228 2874 140 a X X X X X X X X X

* MM195c 1228 2874 140 **X** **X** X X X X **X** X X X X

* MM166a 1251 2896 130 £ **X** **X** **X** X **X** X X X

* DIE1a 1251 2896 130 £ **X X** **X X** X **X X** X X X

DIE1b-ii 1251 2896 130 £ a X X X X X  X X X X

DIE1c 1251 2896 130 X X X X X X X X X

MM162a 1272 2923 120 a a X X X X X X X X

MM162b-i 1272 2923 120 a a X (x) X X X X +Pyt

MM162b-ii 1272 2923 120 a X X X X X X X X X

MM164a-i 1257 2905 120 £ X X (x) X X X X X X

MM164a-ii 1257 2905 120 £ X X X  X X X X X

MM194b 1211 2864 110 £ X X X X X  X X X X

* MM143 1157 2835 100 **X** **X** X X X X **X** **X** X X X

MD15-i 1263 2915 100 £ a X X X X X  X X X X

MD15-ii 1263 2915 100 £ a X X X X X X

* MM141a 1143 2828 90 a **X** **X** X X X X **X** X X X X

* MM166c 1245 2895 90 £ a X **X** **X** **X** X **X**  **X** X X X X

* MM166d 1245 2895 90 £ **X** **X** X X X **X** **X** X X X X

MM166f 1245 2895 90 £ X X X X X  X X X X

MM166j 1245 2895 90 X X X X X X X X X

MM166k 1245 2895 90 X X X X X X X X X X X X

MM166m 1245 2895 90 £ a X X X X X X  X X X X X

DIE9b 1187 2853 90 £ a X X X X X X  X X X

MM167c 1240 2890 80 X X X X X X X X X X

* MD19 1222 2876 70 £ a **X X** **X** X **X X** X X X

MD18 1216 2877 30 £ a X X X X X X X X X

* MM197a 1241 2902 15 £ a **X** **X** X X X X **X** **X** X X X

* MM197b 1241 2902 15 £ a **X** **X** X X X X  **X** X X X

* MM198-i 1249 2911 10  a **X** X X X X  X X X X X

* MM198-ii 1249 2911 10 £ a **X** X X X X X X X X

* MM193d 1186 2864 5 **X** X X X X **X** X X

MM193y 1186 2864 3 £ a X X X X X  X X X

DIE8 1186 2864 3 £ X X X X X X X X

MM193a 1186 2864 <0.01 a X X X X X X X X

__________________________________________________________________________________________________________________________________________ _

**Ms Chl Bt Crd And Sill Crn Spl Grt Opx Qtz Kfs Pl Ilm Zrn Ap Trm**

XenolithsMD9a 112 283 ? <0.01  X X X X X  X X X

MD9b 112 283 ? <0.01 X X X X X X X X X X X

656-i 1263 2752 <0.1 X X X X X X

656-ii 1263 2752 <0.1 X X X X X X

__________________________________________________________________________________________________________________________________________ _
